# Supplementary material
Source: Springer Nature journal article supplement (https://www.springermedizin.de/resource/supplementary/12889_2012_4224_MOESM3_ESM.pdf/9491838)

# Legend

- + Health Posts
- 0 -<30min(89%)\*
- 30-<60mn(75%)
- >=60min(70%)

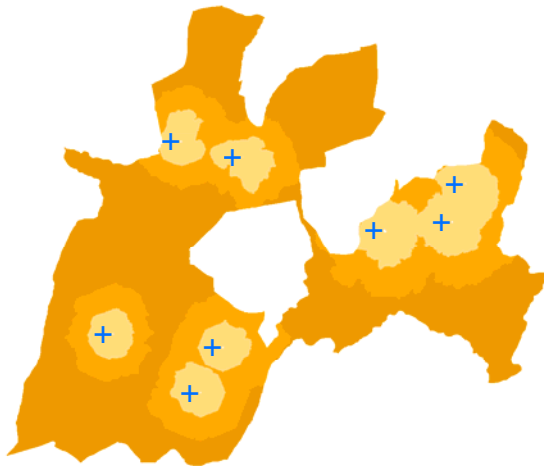

0 2.5 5 10 Kilometers

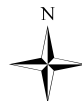

Supplement: MOESM3 [file 9491838]
